# Supplementary material for: Cost of vitamin K antagonist anticoagulant treatment in patients with metallic prosthetic valve in mitral position
Source: PubMed Central journal article supplement — SAGE Open Med. 2016 Aug 8;4:2050312116663123. doi: 10.1177/2050312116663123 (PMC4989584; doi:10.1177/2050312116663123), 2016-08-08
Supplement: Supplementary_material.pdf [file Supplementary_material.pdf]

1 Table I: Characteristics of anticoagulated patients with metallic prosthetic valves in the  
2 mitral position.

|                                         | Male (n=34) |       | Female (n=117) |       | Overall (n=151) |       |
|-----------------------------------------|-------------|-------|----------------|-------|-----------------|-------|
|                                         | Mean/<br>%  | SD    | Mean/ %        | SD    | Mean/ %         | SD    |
| <b>Age (mean)</b>                       | 65.03       | 11.54 | 67.08          | 9.88  | 66.62           | 10.28 |
| <b>Age groups (%)</b>                   |             |       |                |       |                 |       |
| ≤ 60 years                              | 32.35       |       | 0.26           |       | 0.28            |       |
| 61 -70 years                            | 29.41       |       | 0.32           |       | 0.32            |       |
| 71 -80 years                            | 32.35       |       | 0.34           |       | 0.34            |       |
| ≥ 81 years                              | 5.88        |       | 0.07           |       | 0.07            |       |
| <b>Principal diagnosis (%)</b>          |             |       |                |       |                 |       |
| Mitral prosthesis (n = 90)              | 61.76       |       | 58.97          |       | 59.60           |       |
| Mitro-aortic prostheses (n = 57)        | 35.29       |       | 38.46          |       | 37.75           |       |
| Mitral and tricuspid prostheses (n = 4) | 2.94        |       | 2.56           |       | 2.65            |       |
| <b>Patients with comorbidity (%)</b>    |             |       |                |       |                 |       |
| Hypertension                            | 52.94       |       | 0.62           |       | 0.60            |       |
| Diabetes Mellitus                       | 17.65       |       | 0.21           |       | 0.21            |       |
| Cardiac Insufficiency                   | 35.29       |       | 23.08          |       | 25.83           |       |
| Dyslipidemia (high cholesterol)         | 38.24       |       | 55.56          |       | 51.66           |       |
| Atrial fibrillation                     | 73.53       |       | 87.18          |       | 84.11           |       |
| Chronic pulmonary disease               | 32.35       |       | 17.09          |       | 20.53           |       |
| Endocrine pathology                     | 5.88        |       | 27.35          |       | 22.52           |       |
| Hepatic disease                         | 26.47       |       | 5.98           |       | 10.60           |       |
| Digestive Disease                       | 14.71       |       | 2.56           |       | 5.30            |       |
| <b>Total visits per patient</b>         | 60.68       | 35.04 | 74.22          | 38.27 | 71.17           | 37.88 |
| <b>Mean visits per patient per year</b> | 22.34       | 6.39  | 24.92          | 7.33  | 24.34           | 7.19  |
| <b>Time monitored (mean, months)</b>    | 32.55       | 16.91 | 37.02          | 17.52 | 36.02           | 17.43 |
| <b>Weekly dose (mg) OAT (mean)</b>      | 13.69       | 7.72  | 14.90          | 6.38  | 14.63           | 6.70  |

3 \* During the study

4 OAT: oral anticoagulation therapy

5

1 Table II: Direct Health Care Costs (2010)

| <b>Health care resource</b>                                  |               |
|--------------------------------------------------------------|---------------|
| <b>Oral Anticoagulant Treatment (drug costs)<sup>a</sup></b> |               |
| Sintrom (acenocoumarol) 1 mg                                 | € 0.032/mg    |
| Sintrom (acenocoumaron) 4 mg                                 | € 0.033/mg    |
| Aldocumar (warfarin) 1 mg                                    | € 0.040/mg    |
| Aldocumar (warfarin) 3 mg                                    | € 0.025/mg    |
| Aldocumar (warfarin) 5 mg                                    | € 0.018/mg    |
| Aldocumar (warfarin) 10 mg                                   | € 0.014/mg    |
| <b>INR monitoring<sup>b</sup></b>                            | € 2.733*      |
| <b>Medical visit<sup>b</sup></b>                             | € 17.41       |
| <b>Rescue medication<sup>b</sup></b>                         |               |
| Enoxaparin sodium 20mg/0,2ml                                 | € 3.277/mg    |
| Enoxaparin sodium 40mg/0,4ml                                 | € 5.054/mg    |
| Enoxaparin sodium 60mg/0,6ml                                 | € 6.179/mg    |
| Vitamin K**                                                  | € 0.376/mg    |
| <b>Related complications<sup>c</sup></b>                     |               |
| Emergency visits                                             | Price per GRD |
| Hospitalization                                              | Price per GRD |
| Bridge therapy                                               | Price per GRD |

2 <sup>a</sup> Source: Drug Database General Council of Pharmacists Spanish3 <sup>b</sup> Source: hospital cost accounting.4 <sup>c</sup> Source: Diagnosis related group (GRD). Ministerio de Sanidad, Servicios Sociales e  
5 Igualdad.6 \*€/INR determination (includes cost of test strip, pipette and lancets). The cost is  
7 doubled when INR>5 (as the number of material needed is double).

8 \*\*Vitamin K was administered orally (drops)

9
